# Supplementary material for: Genetic Associations with Polycystic Ovary Syndrome: The Role of The Mitochondrial Genome; A Systematic Review and Meta-analysis
Source: bioRxiv or medRxiv preprint supplement (doi:10.1101/2022.01.22.22269680), 2022-01-24
Supplement: Supplementary file [file media-1.pdf]

## SUPPLEMENT 1 – SEARCH TERMS

---

### Search terms relating to “Mitochondrial Genetics”

|                                   |                                |
|-----------------------------------|--------------------------------|
| Association analysis              | Haplotype                      |
| Candidate gene                    | Heavy strand                   |
| Circular DNA                      | HVR-1                          |
| Coding region                     | HVR-2                          |
| Copy number                       | Hypervariable                  |
| Copy number variation             | Hypervariable region           |
| D-loop                            | Hypervariable region-1         |
| Deep sequencing                   | Hypervariable region-2         |
| Deletion                          | Insertion                      |
| Displacement loop                 | Light strand                   |
| DNA                               | Messenger RNA                  |
| DNA polymerase-gamma              | Microsatellite repeat          |
| DNA sequence                      | Mitochondrial DNA              |
| Electron transport chain          | Mitochondrial genome           |
| ETC                               | Mitochondrial-encoded          |
| Gen* linkage                      | Mitoribosome                   |
| Gen* mapping                      | mtDNA                          |
| Gen* mutation                     | Multifactorial inheritance     |
| Gene expression                   | Mutation                       |
| Gene expression profiling         | Next generation sequencing     |
| Gene expression regulation        | NGS                            |
| Gene frequency                    | Non-coding region              |
| Gene* profile                     | Nucleotide sequencing          |
| Gene regulatory network           | Organelle                      |
| Gene sequencing                   | Oxidative stress               |
| Gene* variant                     | PCR                            |
| Genes                             | Phenotype                      |
| Genetic analysis                  | Polygenic                      |
| Genetic association               | Polymerase chain reaction      |
| Genetic association study         | Polymorphism                   |
| Genetic background                | Promoter region                |
| Genetic defect                    | Reactive oxygen species        |
| Genetic epidemiology              | Respiratory chain              |
| Genetic factor                    | Respiratory chain complex      |
| Genetic influence                 | ROS                            |
| Genetic linkage                   | Single nucleotide polymorphism |
| Genetic marker                    | SNP                            |
| Genetic polymorphism              | Southern blot                  |
| Genetic predisposition to disease | Tandem repeat                  |
| Genetic stud*                     | Transcript*                    |
| Genetic susceptibility            | Transcription factor           |
| Genetic techniqu*                 | Translation                    |
| Genetic test*                     | Trinucleotide repeat           |
| Genetic variation                 | Western blot                   |
| Genetic*                          | Whole exome sequencing         |
| Genome                            |                                |
| Genome analysis                   |                                |
| Genome-wide                       |                                |
| Genome-wide association           |                                |
| Genomics                          |                                |

**Search terms relating to PCOS**

Multicystic ovary

Polycystic ovary

PCO

PCOS

Polycystic disease of the ovary

Polycystic Ovarian Disease

Polycystic Ovarian Syndrome

Polycystic ovaries

Polycystic ovary disease

Polycystic ovary morphology

Polycystic Ovary Syndrome

POS

Stein-Leventhal Syndrome

Stein Leventhal Syndrome

## SUPPLEMENT 2 – POLYMORPHISMS IN CODING REGIONS OF THE MITOCHONDRIAL GENOME

| Study ID  | Gene | Position |
|-----------|------|----------|
| Zhuo 2010 | A6   | 8584     |
| Zhuo 2010 | A6   | 8701     |
| Zhuo 2010 | A6   | 8745     |
| Zhuo 2010 | A6   | 8794     |
| Zhuo 2010 | A6   | 9053     |
| Zhuo 2010 | A6   | 9101     |
| Zhuo 2010 | A6   | 9128     |
| Zhuo 2010 | A6   | 9180     |
| Zhuo 2012 | A6   | 8584     |
| Zhuo 2012 | A6   | 8684     |
| Zhuo 2012 | A6   | 8745     |
| Zhuo 2012 | A6   | 8793     |
| Zhuo 2012 | A6   | 8860     |
| Zhuo 2012 | A6   | 9053     |
| Zhuo 2012 | A6   | 9126     |
| Zhuo 2012 | A6   | 9128     |
| Ding 2016 | A6   | 8585     |
| Ding 2016 | A6   | 8860     |
| Ding 2017 | A6   | 8584     |
| Ding 2017 | A6   | 8684     |
| Zhuo 2010 | A8   | 8392     |
| Zhuo 2010 | A8   | 8414     |
| Zhuo 2010 | A8   | 8459     |
| Zhuo 2010 | A8   | 8473     |
| Zhuo 2012 | A8   | 8392     |
| Zhuo 2012 | A8   | 8414     |
| Zhuo 2012 | A8   | 8459     |
| Zhuo 2012 | A8   | 8473     |
| Ding 2016 | A8   | 8414     |
| Zhuo 2010 | COX1 | 6392     |
| Zhuo 2010 | COX1 | 6962     |
| Ding 2016 | COX1 | 6392     |
| Ding 2016 | COX1 | 7028     |
| Ding 2018 | COX1 | 7028     |
| Zhuo 2012 | COX2 | 6221     |
| Zhuo 2012 | COX2 | 6272     |
| Zhuo 2012 | COX2 | 6338     |
| Zhuo 2012 | COX2 | 6392     |
| Zhuo 2012 | COX2 | 6455     |
| Zhuo 2012 | COX2 | 6962     |
| Zhuo 2012 | COX2 | 7028     |
| Zhuo 2012 | COX2 | 7142     |
| Zhuo 2010 | COX2 | 7853     |
| Ding 2016 | COX2 | 8020     |

| Study ID  | Gene | Position |
|-----------|------|----------|
| Zhuo 2010 | COX3 | 9536     |
| Zhuo 2010 | COX3 | 9540     |
| Zhuo 2010 | COX3 | 9548     |
| Zhuo 2010 | COX3 | 9824     |
| Zhuo 2012 | COX3 | 9242     |
| Zhuo 2012 | COX3 | 9336     |
| Zhuo 2012 | COX3 | 9377     |
| Zhuo 2012 | COX3 | 9540     |
| Zhuo 2012 | COX3 | 9559     |
| Zhuo 2012 | COX3 | 9824     |
| Ding 2016 | COX3 | 9540     |
| Ding 2016 | COX3 | 9824     |
| Zhuo 2010 | CYTB | 14783    |
| Zhuo 2010 | CYTB | 15038    |
| Zhuo 2010 | CYTB | 15043    |
| Zhuo 2010 | CYTB | 15244    |
| Zhuo 2010 | CYTB | 15346    |
| Zhuo 2010 | CYTB | 15301    |
| Zhuo 2012 | CYTB | 14783    |
| Zhuo 2012 | CYTB | 15043    |
| Zhuo 2012 | CYTB | 15244    |
| Zhuo 2012 | CYTB | 15301    |
| Zhuo 2012 | CYTB | 15326    |
| Zhuo 2012 | CYTB | 15460    |
| Zhuo 2012 | CYTB | 15724    |
| Ding 2016 | CYTB | 14766    |
| Ding 2016 | CYTB | 15301    |
| Ding 2016 | CYTB | 15326    |
| Ding 2018 | CYTB | 14766    |
| Ding 2018 | CYTB | 15326    |
| Ding 2018 | CYTB | 15535    |
| Zhuo 2010 | ND1  | 3316     |
| Zhuo 2010 | ND1  | 3394     |
| Zhuo 2010 | ND1  | 3497     |
| Zhuo 2010 | ND1  | 3970     |
| Zhuo 2010 | ND1  | 4086     |
| Zhuo 2010 | ND1  | 4248     |
| Zhuo 2012 | ND1  | 3316     |
| Zhuo 2012 | ND1  | 3394     |
| Zhuo 2012 | ND1  | 3423     |
| Zhuo 2012 | ND1  | 3497     |
| Zhuo 2012 | ND1  | 3552     |
| Zhuo 2012 | ND1  | 3834     |
| Zhuo 2012 | ND1  | 3970     |

| Study ID  | Gene | Position |
|-----------|------|----------|
| Zhuo 2012 | ND1  | 4086     |
| Ding 2016 | ND1  | 3553     |
| Ding 2016 | ND1  | 4047     |
| Ding 2017 | ND1  | 3394     |
| Zhuo 2010 | ND2  | 5147     |
| Zhuo 2010 | ND2  | 5178     |
| Zhuo 2010 | ND2  | 5301     |
| Zhuo 2010 | ND2  | 5417     |
| Zhuo 2010 | ND2  | 5460     |
| Zhuo 2012 | ND2  | 4688     |
| Zhuo 2012 | ND2  | 4769     |
| Zhuo 2012 | ND2  | 4883     |
| Zhuo 2012 | ND2  | 5046     |
| Zhuo 2012 | ND2  | 5108     |
| Zhuo 2012 | ND2  | 5147     |
| Zhuo 2012 | ND2  | 5178     |
| Zhuo 2012 | ND2  | 5231     |
| Zhuo 2012 | ND2  | 5263     |
| Zhuo 2012 | ND2  | 5301     |
| Zhuo 2012 | ND2  | 5417     |
| Zhuo 2012 | ND2  | 5460     |
| Ding 2018 | ND2  | 4715     |
| Ding 2018 | ND2  | 4820     |
| Zhuo 2010 | ND3  | 10310    |
| Zhuo 2010 | ND3  | 10397    |
| Zhuo 2010 | ND3  | 10398    |
| Zhuo 2010 | ND3  | 10400    |
| Zhuo 2012 | ND3  | 10097    |
| Zhuo 2012 | ND3  | 10238    |
| Zhuo 2012 | ND3  | 10310    |
| Zhuo 2012 | ND3  | 10398    |
| Zhuo 2012 | ND3  | 10400    |
| Ding 2016 | ND3  | 10398    |
| Ding 2016 | ND3  | 10400    |
| Zhuo 2012 | ND4  | 10873    |
| Zhuo 2012 | ND4  | 10915    |
| Zhuo 2012 | ND4  | 11084    |
| Zhuo 2012 | ND4  | 11335    |
| Zhuo 2012 | ND4  | 11440    |
| Zhuo 2012 | ND4  | 11719    |
| Zhuo 2012 | ND4  | 11944    |
| Zhuo 2012 | ND4  | 12026    |

| Study ID  | Gene | Position |
|-----------|------|----------|
| Zhuo 2010 | ND4  | 10609    |
| Zhuo 2010 | ND4  | 10873    |
| Zhuo 2010 | ND4  | 11084    |
| Zhuo 2010 | ND4  | 11914    |
| Zhuo 2010 | ND4  | 11944    |
| Zhuo 2010 | ND4  | 12026    |
| Ding 2016 | ND4  | 10873    |
| Ding 2016 | ND4  | 11719    |
| Ding 2018 | ND4  | 11719    |
| Zhuo 2010 | ND5  | 12406    |
| Zhuo 2010 | ND5  | 12705    |
| Zhuo 2010 | ND5  | 12882    |
| Zhuo 2010 | ND5  | 13759    |
| Zhuo 2010 | ND5  | 13824    |
| Zhuo 2010 | ND5  | 13928    |
| Zhuo 2010 | ND5  | 13942    |
| Zhuo 2010 | ND5  | 14067    |
| Zhuo 2012 | ND5  | 12406    |
| Zhuo 2012 | ND5  | 12705    |
| Zhuo 2012 | ND5  | 12811    |
| Zhuo 2012 | ND5  | 13145    |
| Zhuo 2012 | ND5  | 13263    |
| Zhuo 2012 | ND5  | 13434    |
| Zhuo 2012 | ND5  | 13708    |
| Zhuo 2012 | ND5  | 13759    |
| Zhuo 2012 | ND5  | 13928    |
| Ding 2016 | ND5  | 12705    |
| Ding 2016 | ND5  | 13928    |
| Ding 2018 | ND5  | 13928    |
| Ding 2017 | ND5  | 12811    |
| Ding 2016 | ND5  | 12338    |
| Zhuo 2010 | ND6  | 14668    |
| Zhuo 2012 | ND6  | 14199    |
| Zhuo 2012 | ND6  | 14272    |
| Zhuo 2012 | ND6  | 14365    |
| Zhuo 2012 | ND6  | 14569    |
| Zhuo 2012 | ND6  | 14668    |
| Ding 2018 | ND6  | 14470    |

## SUPPLEMENT 3 - POLYMORPHISMS IN GENES CODING FOR MITOCHONDRIAL tRNAs

### All polymorphisms detected in genes coding for mt-tRNAs

| Study ID   | Gene     | Position | PCOS sample size | PCOS with SNP | PCOS without SNP | Frequency in PCOS (%) | Control sample size | Controls with SNP | Controls without SNP | Frequency in Controls (%) |
|------------|----------|----------|------------------|---------------|------------------|-----------------------|---------------------|-------------------|----------------------|---------------------------|
| Zhuo 2012  | tRNA Arg | 10454    | 57               | 1             | 56               | 1.7                   | 38                  | 0                 | 38                   | 0                         |
| Ding 2017  | tRNA Arg | 10454    | 80               | 2             | 78               | 2.5                   | 50                  | 0                 | 50                   | 0                         |
| Zhuo 2012  | tRNA Asp | 7543     | 57               | 1             | 56               | 1.7                   | 38                  | 0                 | 38                   | 0                         |
| Ding 2017  | tRNA Asp | 7543     | 80               | 1             | 79               | 1.25                  | 50                  | 0                 | 50                   | 0                         |
| Zhuo 2012  | tRNA Cys | 5821     | 57               | 1             | 56               | 1.7                   | 38                  | 0                 | 38                   | 0                         |
| Ding 2017  | tRNA Cys | 5821     | 80               | 3             | 77               | 3.75                  | 50                  | 1                 | 49                   | 2                         |
| Zhuo 2010  | tRNA Gln | 14693    | N/A              | N/A           | N/A              | N/A                   | N/A                 | N/A               | N/A                  | N/A                       |
| Ding 2018  | tRNA Gln | 4363     | N/A              | N/A           | N/A              | N/A                   | N/A                 | N/A               | N/A                  | N/A                       |
| Ding 2017  | tRNA Gln | 4363     | 80               | 4             | 76               | 5                     | 50                  | 0                 | 50                   | 0                         |
| Ding 2017  | tRNA Gln | 4395     | 80               | 1             | 79               | 1.25                  | 50                  | 0                 | 50                   | 0                         |
| Zhuo 2012  | tRNA Glu | 4395     | 57               | 17            | 40               | 29.8                  | 38                  | 0                 | 38                   | 0                         |
| Ding 2017  | tRNA Glu | 14693    | 80               | 1             | 79               | 1.25                  | 50                  | 0                 | 50                   | 0                         |
| Ding 2017  | tRNA Met | 4454     | 80               | 0             | 80               | 0                     | 50                  | 2                 | 48                   | 4                         |
| Ding 2016  | tRNA Leu | 3302     | N/A              | N/A           | N/A              | N/A                   | N/A                 | N/A               | N/A                  | N/A                       |
| Ding 2018  | tRNA Leu | 3275     | N/A              | N/A           | N/A              | N/A                   | N/A                 | N/A               | N/A                  | N/A                       |
| Ding 2017  | tRNA Leu | 3302     | 80               | 1             | 79               | 1.25                  | 50                  | 0                 | 50                   | 0                         |
| Ding 2017  | tRNA Leu | 3275     | 80               | 2             | 78               | 2.5                   | 50                  | 0                 | 50                   | 0                         |
| Saeed 2019 | tRNA Leu | 3157     | 70               | 2             | 68               | 2.86                  | 59                  | 0                 | 59                   | 0                         |
| Saeed 2019 | tRNA Leu | 3162     | 70               | 0             | 70               | 0                     | 59                  | 0                 | 59                   | 0                         |
| Saeed 2019 | tRNA Leu | 3203     | 70               | 3             | 67               | 4.29                  | 59                  | 1                 | 58                   | 1.69                      |
| Saeed 2019 | tRNA Leu | 3282     | 70               | 2             | 68               | 2.86                  | 59                  | 0                 | 59                   | 0                         |
| Saeed 2019 | tRNA Leu | 3285     | 70               | 2             | 68               | 2.86                  | 59                  | 0                 | 59                   | 0                         |
| Saeed 2019 | tRNA Leu | 3302     | 70               | 2             | 68               | 2.86                  | 59                  | 0                 | 59                   | 0                         |
| Saeed 2019 | tRNA Leu | 3275     | 70               | 4             | 66               | 5.71                  | 59                  | 0                 | 59                   | 0                         |

|            |          |       |     |     |     |      |     |     |     |      |
|------------|----------|-------|-----|-----|-----|------|-----|-----|-----|------|
| Saeed 2019 | tRNA Leu | 4225  | 70  | 1   | 69  | 1.43 | 59  | 0   | 59  | 0    |
| Saeed 2019 | tRNA Leu | 5206  | 70  | 3   | 67  | 4.29 | 59  | 0   | 59  | 0    |
| Saeed 2019 | tRNA Leu | 8434  | 70  | 1   | 69  | 1.43 | 59  | 3   | 56  | 5.08 |
| Zhuo 2012  | tRNA Lys | 8343  | 57  | 1   | 56  | 1.7  | 38  | 0   | 38  | 0    |
| Ding 2018  | tRNA Lys | 8343  | N/A | N/A | N/A | N/A  | N/A | N/A | N/A | N/A  |
| Ding 2017  | tRNA Lys | 8343  | 80  | 2   | 78  | 2.5  | 50  | 0   | 50  | 0    |
| Ding 2017  | tRNA Ser | 7492  | 80  | 1   | 79  | 1.25 | 50  | 0   | 50  | 0    |
| Ding 2016  | tRNA Ser | 7492  | N/A | N/A | N/A | N/A  | N/A | N/A | N/A | N/A  |
| Ding 2017  | tRNA Thr | 15900 | 80  | 0   | 80  | 0    | 50  | 1   | 49  | 2    |

**Dataset used in meta-analysis**

| <b>Mitochondrial-encoded tRNA</b> | <b>Frequency of SNP in PCOS (%)</b> | <b>Frequency of SNP in Control (%)</b> |
|-----------------------------------|-------------------------------------|----------------------------------------|
| Cys                               | 2.9                                 | 1.1                                    |
| Leu                               | 2.7                                 | 0.6                                    |
| Glu                               | 13.1                                | 0.0                                    |
| Gln                               | 3.1                                 | 0.0                                    |
| Lys                               | 2.2                                 | 0.0                                    |
| Arg                               | 1.9                                 | 0.0                                    |
| Asp                               | 1.5                                 | 0.0                                    |

## SUPPLEMENT 4 – POLYMORPHISMS IN GENES CODING FOR MITOCHONDRIAL rRNAs

---

| <b>Study ID</b> | <b>Gene</b> | <b>Position</b> |
|-----------------|-------------|-----------------|
| Zhuo 2010       | 12S rRNA    | 663             |
| Zhuo 2010       | 12S rRNA    | 709             |
| Zhuo 2010       | 12S rRNA    | 752             |
| Zhuo 2010       | 12S rRNA    | 827             |
| Zhuo 2010       | 12S rRNA    | 1438            |
| Zhuo 2012       | 12S rRNA    | 663             |
| Zhuo 2012       | 12S rRNA    | 709             |
| Zhuo 2012       | 12S rRNA    | 750             |
| Zhuo 2012       | 12S rRNA    | 752             |
| Zhuo 2012       | 12S rRNA    | 827             |
| Zhuo 2012       | 12S rRNA    | 1382            |
| Zhuo 2012       | 12S rRNA    | 1438            |
| Ding 2016       | 12S rRNA    | 750             |
| Ding 2016       | 12S rRNA    | 1438            |
| Ding 2018       | 12S rRNA    | 750             |
| Ding 2018       | 12S rRNA    | 827             |
| Ding 2018       | 12S rRNA    | 1438            |
| Zhuo 2010       | 16S rRNA    | 1736            |
| Zhuo 2010       | 16S rRNA    | 3010            |
| Zhuo 2012       | 16S rRNA    | 1736            |
| Zhuo 2012       | 16S rRNA    | 2706            |
| Zhuo 2012       | 16S rRNA    | 3010            |
| Ding 2016       | 16S rRNA    | 1734            |
| Ding 2016       | 16S rRNA    | 2706            |
| Ding 2018       | 16S rRNA    | 2706            |
| Ding 2018       | 16S rRNA    | 3109            |

## SUPPLEMENT 5 – POLYMORPHISMS IN THE D-LOOP OF THE MITOCHONDRIAL GENOME

### All polymorphisms detected in the D-Loop of the mitochondrial genome

| Study ID   | Polymorphism | PCOS sample size | PCOS with SNP | PCOS without SNP | Frequency in PCOS (%) | Control sample size | Control with SNP | Control without SNP | Frequency in controls (%) |
|------------|--------------|------------------|---------------|------------------|-----------------------|---------------------|------------------|---------------------|---------------------------|
| Zhuo 2012  | A73G         | 57               | 10            | 47               | 17.5                  | 38                  | 8                | 30                  | 21.6                      |
| Zhuo 2012  | T146C        | 57               | 1             | 56               | 1.7                   | 38                  | 1                | 37                  | 2.7                       |
| Zhuo 2012  | C150T        | 57               | 6             | 51               | 10.5                  | 38                  | 3                | 35                  | 8.1                       |
| Zhuo 2012  | A153G        | 57               | 4             | 53               | 7.0                   | 38                  | 2                | 36                  | 5.4                       |
| Zhuo 2012  | T195A        | 57               | 5             | 52               | 8.7                   | 38                  | 2                | 36                  | 5.4                       |
| Zhuo 2012  | A235G        | 57               | 3             | 54               | 5.3                   | 38                  | 2                | 36                  | 5.4                       |
| Zhuo 2012  | A263G        | 57               | 8             | 49               | 14.0                  | 38                  | 7                | 31                  | 18.9                      |
| Zhuo 2012  | G316A        | 57               | 1             | 56               | 1.7                   | 38                  | 0                | 38                  | 0                         |
| Zhuo 2012  | T489A        | 57               | 4             | 53               | 7.0                   | 38                  | 3                | 35                  | 8.1                       |
| Zhuo 2012  | G16129A      | 57               | 2             | 55               | 3.5                   | 38                  | 2                | 36                  | 5.4                       |
| Zhuo 2012  | T16140C      | 57               | 3             | 54               | 5.3                   | 38                  | 0                | 38                  | 0                         |
| Zhuo 2012  | T16189C      | 57               | 6             | 51               | 10.5                  | 38                  | 4                | 34                  | 10.8                      |
| Zhuo 2012  | C16223T      | 57               | 9             | 48               | 15.8                  | 38                  | 2                | 36                  | 5.4                       |
| Zhuo 2012  | A16316G      | 57               | 6             | 51               | 10.5                  | 38                  | 5                | 33                  | 13.5                      |
| Zhuo 2012  | T16357C      | 57               | 1             | 56               | 1.7                   | 38                  | 0                | 38                  | 0                         |
| Zhuo 2012  | T16519C      | 57               | 2             | 55               | 3.5                   | 38                  | 1                | 37                  | 2.7                       |
| Reddy 2019 | A73G         | 118              | 75            | 43               | 63.6                  | 114                 | 75               | 39                  | 65.8                      |
| Reddy 2019 | A93G         | 118              | 7             | 111              | 5.9                   | 114                 | 4                | 110                 | 3.5                       |
| Reddy 2019 | T146C        | 118              | 8             | 110              | 6.8                   | 114                 | 12               | 102                 | 10.5                      |
| Reddy 2019 | T152C        | 118              | 23            | 95               | 19.5                  | 114                 | 23               | 91                  | 20.2                      |
| Reddy 2019 | A189G        | 118              | 31            | 87               | 26.3                  | 114                 | 15               | 99                  | 13.2                      |
| Reddy 2019 | T195A        | 118              | 8             | 110              | 6.8                   | 114                 | 7                | 107                 | 6.1                       |
| Reddy 2019 | A263G        | 118              | 72            | 46               | 61.0                  | 114                 | 76               | 38                  | 66.7                      |
| Reddy 2019 | 316C         | 118              | 71            | 47               | 60.1                  | 114                 | 68               | 46                  | 59.6                      |
| Reddy 2019 | T489C        | 118              | 25            | 93               | 21.2                  | 114                 | 14               | 100                 | 12.3                      |
| Reddy 2019 | 522CA        | 118              | 15            | 103              | 12.7                  | 114                 | 7                | 107                 | 6.1                       |



|            |               |     |     |     |       |     |     |     |       |
|------------|---------------|-----|-----|-----|-------|-----|-----|-----|-------|
| Reddy 2019 | G16129A       | 118 | 9   | 109 | 7.6   | 114 | 11  | 103 | 9.6   |
| Reddy 2019 | T16172C       | 118 | 10  | 108 | 8.5   | 114 | 11  | 103 | 9.6   |
| Reddy 2019 | T16189C       | 118 | 14  | 104 | 11.9  | 114 | 15  | 99  | 13.2  |
| Reddy 2019 | C16223T       | 118 | 44  | 74  | 37.3  | 114 | 52  | 62  | 45.6  |
| Reddy 2019 | T16311C       | 118 | 13  | 105 | 11.0  | 114 | 16  | 98  | 14.0  |
| Reddy 2019 | G16319A       | 118 | 12  | 106 | 10.2  | 114 | 5   | 109 | 4.4   |
| Reddy 2019 | T16362C       | 118 | 14  | 104 | 11.9  | 114 | 8   | 106 | 7.0   |
| Reddy 2019 | T16519C       | 118 | 63  | 55  | 53.4  | 114 | 54  | 60  | 47.4  |
| Reddy 2019 | D310          | 118 | 64  | 54  | 54.2  | 114 | 33  | 81  | 28.9  |
| Deng 2021  | C150T         | 421 | 79  | 342 | 18.76 | 409 | 103 | 306 | 25.18 |
| Deng 2021  | G207A         | 421 | 11  | 410 | 2.61  | 409 | 28  | 381 | 6.85  |
| Deng 2021  | A263G         | 421 | 418 | 3   | 99.29 | 409 | 399 | 10  | 97.56 |
| Deng 2021  | 16036G        | 421 | 24  | 397 | 5.70  | 409 | 42  | 367 | 10.27 |
| Deng 2021  | 16036GG       | 421 | 2   | 419 | 0.48  | 409 | 22  | 387 | 5.38  |
| Deng 2021  | 16049G        | 421 | 2   | 419 | 0.48  | 409 | 36  | 373 | 8.80  |
| Deng 2021  | C16234T       | 421 | 17  | 404 | 4.04  | 409 | 30  | 379 | 7.33  |
| Deng 2021  | T16362C       | 421 | 169 | 252 | 40.14 | 409 | 196 | 213 | 47.92 |
| Hu 2011    | 16094T/C      | 77  | 7   | 70  | 9.09  | 45  | 4   | 41  | 8.89  |
| Hu 2011    | C16173T       | 77  | 67  | 10  | 87.01 | 45  | 38  | 7   | 84.40 |
| Hu 2011    | 16181 – 16195 | 77  | 76  | 1   | 98.70 | 45  | 44  | 1   | 97.78 |
| Hu 2011    | A2C12         | 77  | 6   | 71  | 7.89  | 45  | 1   | 44  | 2.27  |
| Hu 2011    | A3C11         | 77  | 9   | 68  | 11.84 | 45  | 8   | 37  | 18.18 |
| Hu 2011    | A4C9T         | 77  | 48  | 29  | 63.16 | 45  | 31  | 14  | 70.45 |
| Hu 2011    | A4C8T2        | 77  | 13  | 64  | 17.11 | 45  | 4   | 41  | 9.09  |
| Hu 2011    | T16225C       | 77  | 24  | 53  | 31.17 | 45  | 14  | 31  | 31.11 |
| Hu 2011    | T16300C       | 77  | 9   | 68  | 11.69 | 45  | 8   | 37  | 17.78 |
| Hu 2011    | T16306C       | 77  | 10  | 67  | 12.99 | 45  | 4   | 41  | 8.89  |
| Hu 2011    | T16313C       | 77  | 10  | 67  | 12.99 | 45  | 7   | 38  | 15.56 |
| Hu 2011    | G16321A       | 77  | 9   | 68  | 11.69 | 45  | 8   | 37  | 17.78 |
| Hu 2011    | T16364C       | 77  | 28  | 49  | 36.36 | 45  | 18  | 27  | 40.00 |

|              |         |    |    |    |       |    |    |    |       |
|--------------|---------|----|----|----|-------|----|----|----|-------|
| Hu<br>2011   | T146C   | 77 | 9  | 68 | 11.69 | 45 | 5  | 40 | 11.11 |
| Hu<br>2011   | C150T   | 77 | 62 | 15 | 80.52 | 45 | 39 | 6  | 80.00 |
| Hu<br>2011   | T152C   | 77 | 19 | 58 | 24.68 | 45 | 9  | 36 | 20.00 |
| Hu<br>2011   | C195T   | 77 | 66 | 11 | 85.71 | 45 | 42 | 3  | 93.33 |
| Hu<br>2011   | A248    | 77 | 17 | 60 | 22.08 | 45 | 9  | 36 | 20.00 |
| Hu<br>2011   | T491C   | 77 | 48 | 29 | 62.34 | 45 | 22 | 23 | 48.89 |
| Hu<br>2011   | 303-317 | 77 | 76 | 1  | 98.70 | 45 | 44 | 1  | 97.78 |
| Hu<br>2011   | C8TC6   | 77 | 41 | 36 | 53.95 | 45 | 18 | 27 | 40.91 |
| Hu<br>2011   | C9TC6   | 77 | 11 | 66 | 14.47 | 45 | 5  | 40 | 11.36 |
| Hu<br>2011   | C7TC6   | 77 | 24 | 53 | 31.58 | 45 | 21 | 24 | 47.73 |
| Zhuo<br>2010 | T146C   | -  | -  | -  | -     | -  | -  | -  | -     |
| Zhuo<br>2010 | T150C   | -  | -  | -  | -     | -  | -  | -  | -     |
| Zhuo<br>2010 | T152C   | -  | -  | -  | -     | -  | -  | -  | -     |
| Zhuo<br>2010 | C195T   | -  | -  | -  | -     | -  | -  | -  | -     |
| Zhuo<br>2010 | A200G   | -  | -  | -  | -     | -  | -  | -  | -     |
| Zhuo<br>2010 | G207A   | -  | -  | -  | -     | -  | -  | -  | -     |
| Zhuo<br>2010 | A235G   | -  | -  | -  | -     | -  | -  | -  | -     |
| Zhuo<br>2010 | A263G   | -  | -  | -  | -     | -  | -  | -  | -     |
| Zhuo<br>2010 | T489C   | -  | -  | -  | -     | -  | -  | -  | -     |
| Zhuo<br>2010 | G16129A | -  | -  | -  | -     | -  | -  | -  | -     |
| Zhuo<br>2010 | T16172C | -  | -  | -  | -     | -  | -  | -  | -     |
| Zhuo<br>2010 | T16189C | -  | -  | -  | -     | -  | -  | -  | -     |
| Zhuo<br>2010 | C16223T | -  | -  | -  | -     | -  | -  | -  | -     |
| Zhuo<br>2010 | C16290T | -  | -  | -  | -     | -  | -  | -  | -     |
| Zhuo<br>2010 | G16319A | -  | -  | -  | -     | -  | -  | -  | -     |
| Zhuo<br>2010 | T16362C | -  | -  | -  | -     | -  | -  | -  | -     |
| Zhuo<br>2010 | T16519C | -  | -  | -  | -     | -  | -  | -  | -     |
| Ding<br>2016 | A73G    | -  | -  | -  | -     | -  | -  | -  | -     |
| Ding<br>2016 | T152C   | -  | -  | -  | -     | -  | -  | -  | -     |
| Ding<br>2016 | D310    | -  | -  | -  | -     | -  | -  | -  | -     |

|           |         |   |   |   |   |   |   |   |   |
|-----------|---------|---|---|---|---|---|---|---|---|
| Ding 2016 | T16189C | - | - | - | - | - | - | - | - |
| Ding 2016 | T16519C | - | - | - | - | - | - | - | - |
| Ding 2018 | A73G    | - | - | - | - | - | - | - | - |
| Ding 2018 | C150T   | - | - | - | - | - | - | - | - |
| Ding 2018 | C328T   | - | - | - | - | - | - | - | - |
| Ding 2018 | T16142C | - | - | - | - | - | - | - | - |
| Ding 2018 | T16189C | - | - | - | - | - | - | - | - |
| Ding 2018 | T16224C | - | - | - | - | - | - | - | - |

### **Dataset used in meta-analysis**

| Polymorphism | Study ID   | PCOS sample size | PCOS with SNP | PCOS without SNP | Frequency in PCOS (%) | Control sample size | Control with SNP | Control without SNP | Frequency in controls (%) |
|--------------|------------|------------------|---------------|------------------|-----------------------|---------------------|------------------|---------------------|---------------------------|
| C150T        | Hu 2011    | 77               | 62            | 15               | 80.52                 | 45                  | 39               | 6                   | 80.00                     |
|              | Zhuo 2012  | 57               | 6             | 51               | 10.5                  | 38                  | 3                | 35                  | 8.1                       |
|              | Deng 2021  | 421              | 79            | 342              | 18.76                 | 409                 | 103              | 306                 | 25.18                     |
| T146C        | Hu 2011    | 77               | 9             | 68               | 11.69                 | 45                  | 5                | 40                  | 11.11                     |
|              | Zhuo 2012  | 57               | 1             | 56               | 1.7                   | 38                  | 1                | 37                  | 2.7                       |
|              | Reddy 2019 | 118              | 8             | 110              | 6.8                   | 114                 | 12               | 102                 | 10.5                      |
| A263G        | Zhuo 2012  | 57               | 8             | 49               | 14.0                  | 38                  | 7                | 31                  | 18.9                      |
|              | Reddy 2019 | 118              | 72            | 46               | 61.0                  | 114                 | 76               | 38                  | 66.7                      |
|              | Deng 2021  | 421              | 418           | 3                | 99.29                 | 409                 | 399              | 10                  | 97.56                     |

## SUPPLEMENT 6 – MtDNA COPY NUMBERS

|                                     | Study ID           | Cells     | Total Sample Size (n) | PCOS Sample Size | Control Sample Size | PCOS Log (mean mt CN) | Control Log (mean mt CN) | PCOS SEM | Control SEM | PCOS SD | Control SD |
|-------------------------------------|--------------------|-----------|-----------------------|------------------|---------------------|-----------------------|--------------------------|----------|-------------|---------|------------|
| Included in meta-analysis           | Ding et al. 2017   | Blood     | 130                   | 80               | 50                  | 0.29                  | 0.84                     | 0.31     | 0.88        | 0.44    | 0.79       |
|                                     | Reddy et al. 2019  | Blood     | 232                   | 118              | 114                 | 1.36                  | 1.50                     | 0.44     | 0.56        | 4.78    | 5.98       |
|                                     | Shukla et al. 2020 | Blood     | 60                    | 30               | 30                  | 1.22                  | 1.64                     | 0.33     | 0.35        | 1.81    | 1.92       |
|                                     | Wang et al. 2020   | Granulosa | 107                   | 39               | 68                  | 0.761                 | 1.021                    | 0.05     | 0.06        | 0.31    | 0.49       |
| Insufficient data for meta-analysis | Lee et al. 2011    | Blood     | 110                   | 50               | 60                  | 1.44                  | 1.88                     | -        | -           | -       | -          |
|                                     | Ding et al. 2016   | Blood     | -                     | -                | -                   | -                     | -                        | -        | -           | -       | -          |
|                                     | Ding et al. 2018   | Blood     | -                     | -                | -                   | -                     | -                        | -        | -           | -       | -          |
|                                     | Saeed et al. 2019  | Blood     | 63                    | 38               | 25                  | 0.88                  | 1.00                     | -        | -           | -       | -          |
|                                     | Yang et al. 2020   | Blood     | 88                    | 0                | -                   | -                     | -                        | -        | -           | -       | -          |

## SUPPLEMENT 7 – QUALITY ASSESSMENT SCORES

| Study ID      | Rationale for study | Selection and definition of outcome of interest | Selection and comparability of comparison group | Technical classification of the exposure | Non-technical classification of the exposure | Other sources of bias | Sample size and power | A priori planning of analyses | Statistical methods and control for confounding | Testing of assumptions and inferences for genetic analyses | Appropriateness of inferences drawn from results | Total score | Quality status |
|---------------|---------------------|-------------------------------------------------|-------------------------------------------------|------------------------------------------|----------------------------------------------|-----------------------|-----------------------|-------------------------------|-------------------------------------------------|------------------------------------------------------------|--------------------------------------------------|-------------|----------------|
| Zhuo 2010     | 5                   | 4                                               | 4                                               | 3                                        | 1                                            | 1                     | 2                     | 2                             | 1                                               | 3                                                          | 3                                                | 29          | Poor           |
| Hu 2011       | 4                   | 3                                               | 4                                               | 5                                        | 3                                            | 3                     | 2                     | 5                             | 6                                               | 4                                                          | 3                                                | 42          | Moderate       |
| Lee 2011      | 6                   | 5                                               | 6                                               | 6                                        | 5                                            | 7                     | 2                     | 5                             | 6                                               | 6                                                          | 6                                                | 60          | Good           |
| Rabol 2011    | 7                   | 4                                               | 5                                               | 3                                        | 2                                            | 1                     | 1                     | 5                             | 3                                               | 4                                                          | 5                                                | 40          | Moderate       |
| Zhuo 2012     | 6                   | 5                                               | 5                                               | 3                                        | 3                                            | 2                     | 2                     | 3                             | 5                                               | 5                                                          | 4                                                | 43          | Moderate       |
| Ding 2016a    | 2                   | 2                                               | 2                                               | 2                                        | 1                                            | 2                     | 1                     | 2                             | 1                                               | 3                                                          | 1                                                | 19          | Poor           |
| Ding 2016b    | 1                   | 2                                               | 1                                               | 1                                        | 1                                            | 1                     | 1                     | 2                             | 1                                               | 1                                                          | 1                                                | 13          | Poor           |
| Ding 2017     | 6                   | 6                                               | 6                                               | 6                                        | 6                                            | 2                     | 3                     | 6                             | 4                                               | 7                                                          | 6                                                | 58          | Good           |
| Ding 2018     | 3                   | 2                                               | 2                                               | 3                                        | 1                                            | 2                     | 1                     | 3                             | 2                                               | 4                                                          | 2                                                | 25          | Poor           |
| Reddy 2019    | 7                   | 6                                               | 7                                               | 7                                        | 7                                            | 3                     | 3                     | 7                             | 7                                               | 6                                                          | 3                                                | 63          | Good           |
| Saeed 2019    | 4                   | 2                                               | 4                                               | 6                                        | 4                                            | 3                     | 2                     | 6                             | 5                                               | 1                                                          | 2                                                | 39          | Moderate       |
| Yang 2020     | 7                   | 2                                               | -                                               | 6                                        | 3                                            | 6                     | 2                     | 7                             | 5                                               | 5                                                          | 6                                                | 49          | Good           |
| Shukla 2020   | 6                   | 3                                               | 6                                               | 6                                        | 3                                            | 1                     | 2                     | 5                             | 2                                               | 5                                                          | 5                                                | 44          | Moderate       |
| Wang 2020     | 5                   | 4                                               | 4                                               | 7                                        | 3                                            | 1                     | 1                     | 4                             | 3                                               | 5                                                          | 5                                                | 42          | Moderate       |
| Deng 2021     | 7                   | 3                                               | 5                                               | 3                                        | 3                                            | 1                     | 4                     | 7                             | 7                                               | 6                                                          | 4                                                | 50          | Good           |
| <b>Median</b> | 6                   | 3                                               | 4                                               | 5                                        | 3                                            | 2                     | 2                     | 5                             | 4                                               | 5                                                          | 4                                                |             |                |
| <b>Q1</b>     | 4                   | 2                                               | 2                                               | 3                                        | 1                                            | 1                     | 1                     | 3                             | 2                                               | 3                                                          | 2                                                |             |                |
| <b>Q3</b>     | 7                   | 5                                               | 6                                               | 6                                        | 4                                            | 3                     | 2                     | 6                             | 6                                               | 6                                                          | 5                                                |             |                |
| <b>IQR</b>    | 4-7                 | 2-5                                             | 2-6                                             | 3-6                                      | 1-4                                          | 1-3                   | 1-2                   | 3-6                           | 2-6                                             | 3-6                                                        | 2-5                                              |             |                |
